# Supplementary material for: Low wnt/β-catenin signaling determines leaky vessels in the subfornical organ and affects water homeostasis in mice
Source: eLife journal article supplement (doi:10.7554/elife.43818), 2019-04-01
Supplement: supp [file elife-43818-supp-v1.zip]

Archive with 23 entries (23 files):
- elife_poa_e43818_Figure_4_source_data_1.xlsx
- elife_poa_e43818_Figure_1_figure_supplement_2.pdf
- elife_poa_e43818_Figure_1_figure_supplement_1.pdf
- elife_poa_e43818_Figure_8_figure_supplement_1.pdf
- elife_poa_e43818_Figure_7_figure_supplement_1.pdf
- elife_poa_e43818_Figure_5_figure_supplement_1.pdf
- elife_poa_e43818_Figure_7_figure_supplement_2.pdf
- elife_poa_e43818_Figure_5_source_data_1.xlsx
- elife_poa_e43818_Figure_9_source_data_1.xlsx
- elife_poa_e43818_Figure_5_source_data_2.xlsx
- elife_poa_e43818_Figure_4_figure_supplement_3.pdf
- elife_poa_e43818_Figure_8_source_data_1.xlsx
- elife_poa_e43818_Figure_6_source_data_1.xlsx
- elife_poa_e43818_Figure_3_figure_supplement_1.pdf
- elife_poa_e43818_Figure_4_figure_supplement_1_source_data_1.xlsx
- elife_poa_e43818_Figure_4_figure_supplement_3_source_data_1.xlsx
- elife_poa_e43818_Figure_4_figure_supplement_2.pdf
- elife_poa_e43818_Figure_4_figure_supplement_1.pdf
- elife_poa_e43818_Transparent_Reporting_File.docx
- elife_poa_e43818_Figure_4_source_data_2.xlsx
- elife_poa_e43818_Video_1.mp4
- elife_poa_e43818_Figure_7_source_data_1.xlsx
- elife_poa_e43818_Figure_8_figure_supplement_1_source_data_1.xlsx
