# Supplementary material for: Low wnt/β-catenin signaling determines leaky vessels in the subfornical organ and affects water homeostasis in mice
Source: eLife journal article supplement (doi:10.7554/elife.43818), 2019-04-01
Supplement: supp [file elife-43818-supp-v1.zip › elife_poa_e43818_Figure_1_figure_supplement_2.pdf]

# Figure 1-figure supplement 2\_Benz et al.\_R1

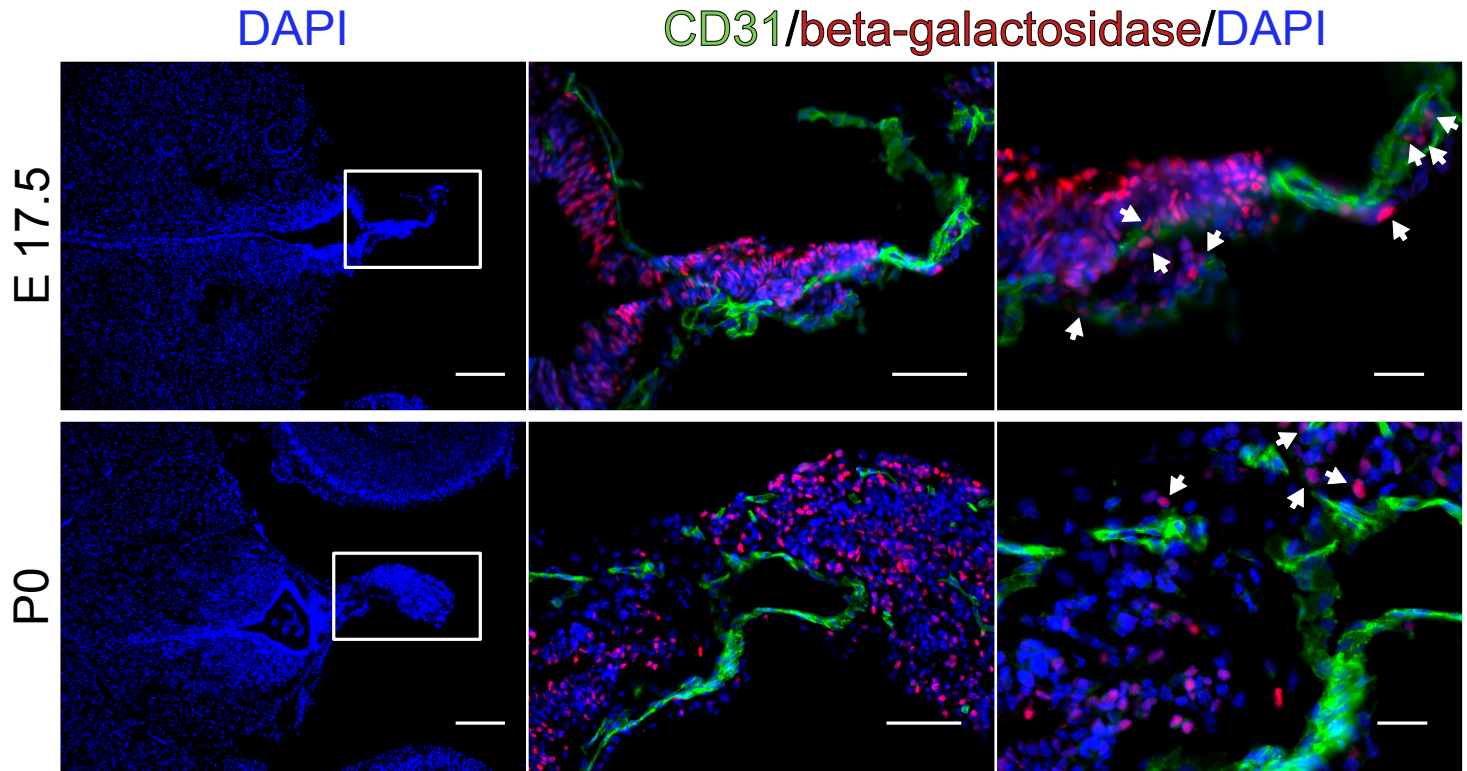

**Figure 1-figure supplement 2: No  $\beta$ -catenin activity in endothelial cells of the pineal gland during development.** Pineal gland (PI) of BAT-gal reporter mice in the developmental stages E17.5 and P0. Arrows point to  $\beta$ -galactosidase-positive nuclei in non-endothelial cells. Scale bar: left (200  $\mu$ m), middle (50  $\mu$ m), right column (20  $\mu$ m).
