# Supplementary material for: Low wnt/β-catenin signaling determines leaky vessels in the subfornical organ and affects water homeostasis in mice
Source: eLife journal article supplement (doi:10.7554/elife.43818), 2019-04-01
Supplement: supp [file elife-43818-supp-v1.zip › elife_poa_e43818_Figure_3_figure_supplement_1.pdf]

# Figure 3-figure supplement 1\_Benz et al.\_R1

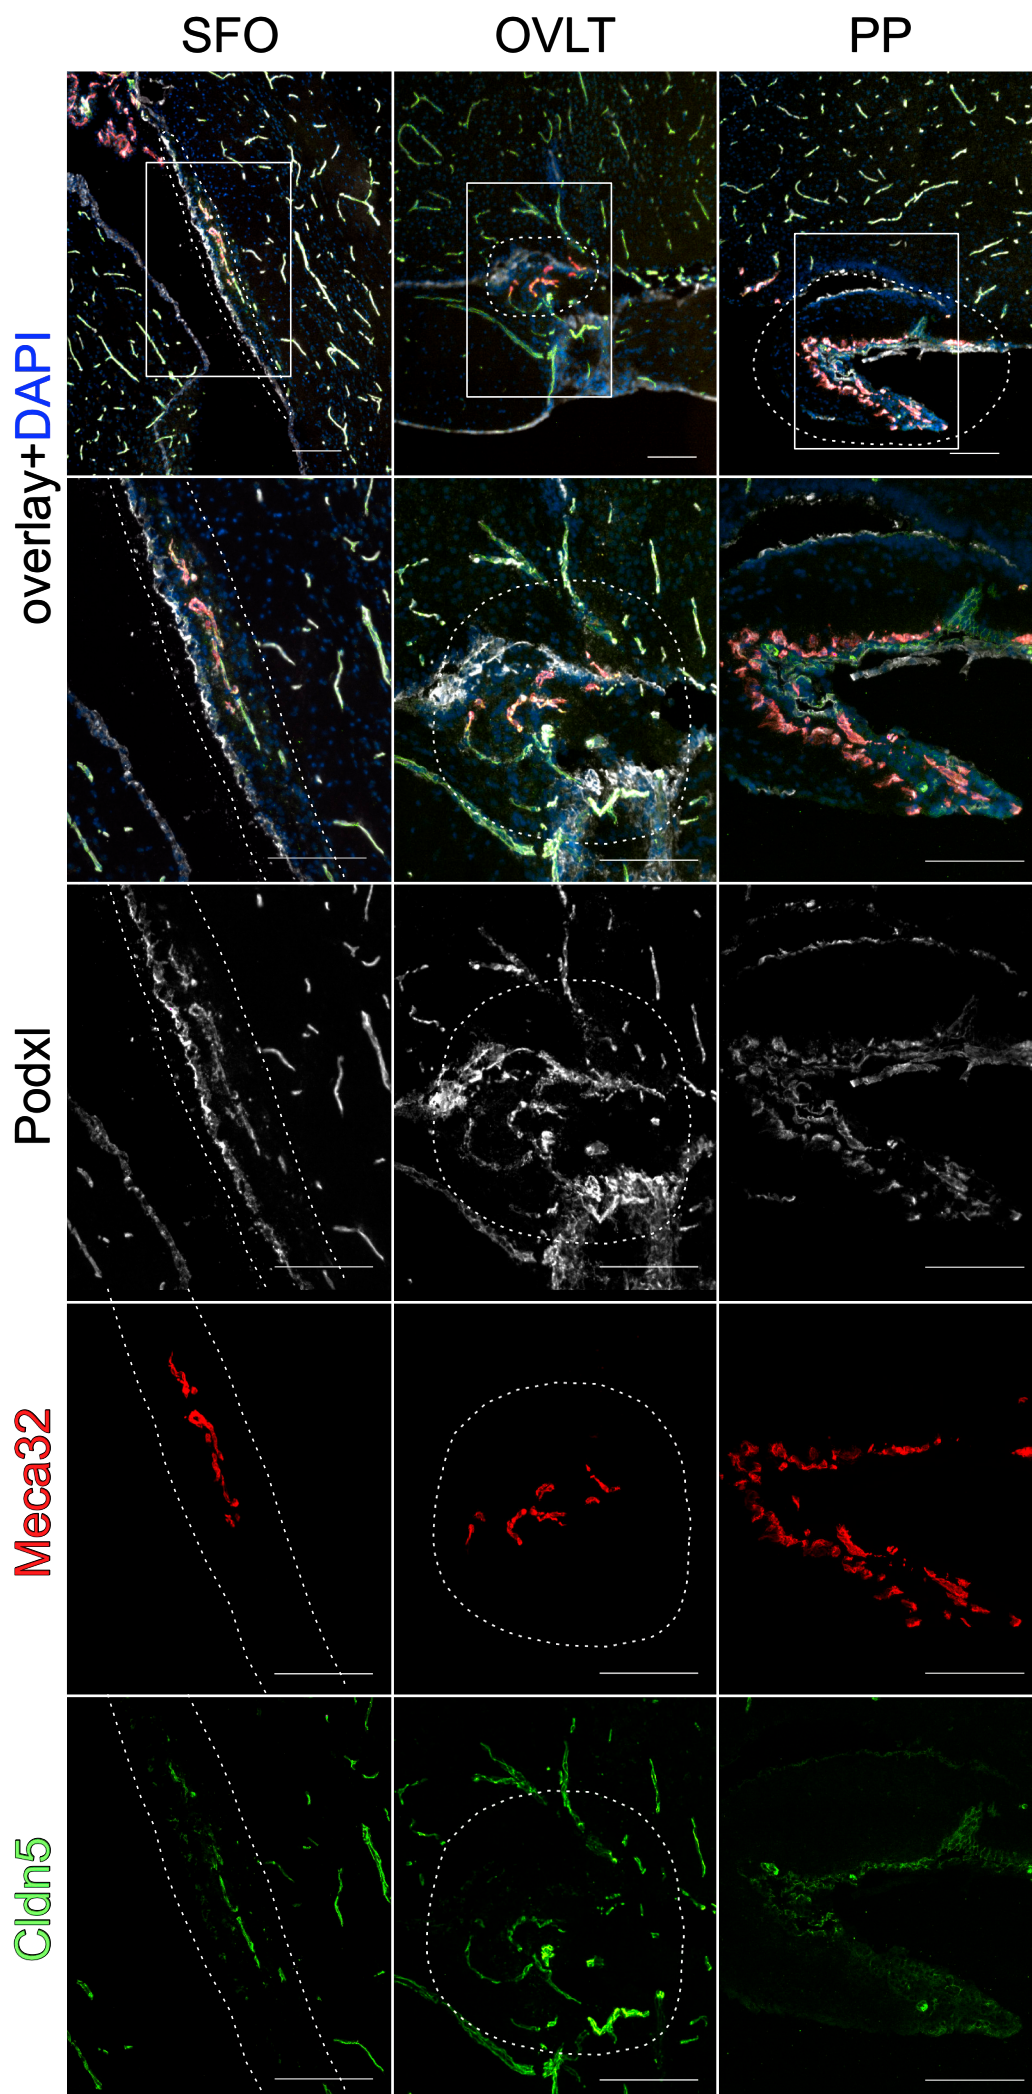

**Figure 3-figure supplement 1: Vessel heterogeneity in sensory circumventricular organs (CVOs) involved in water homeostasis.**

Plvap/Meca32- and Cldn5-positive ECs in vessels of the SFO, OVLT and PP, demonstrating vessels heterogeneity. Scale bar: left (200  $\mu$ m), middle (50  $\mu$ m), right column (20  $\mu$ m).
