# Supplementary material for: Low wnt/β-catenin signaling determines leaky vessels in the subfornical organ and affects water homeostasis in mice
Source: eLife journal article supplement (doi:10.7554/elife.43818), 2019-04-01
Supplement: supp [file elife-43818-supp-v1.zip › elife_poa_e43818_Figure_4_figure_supplement_1.pdf]

Figure 4-figure supplement 1\_Benz et al.\_R1

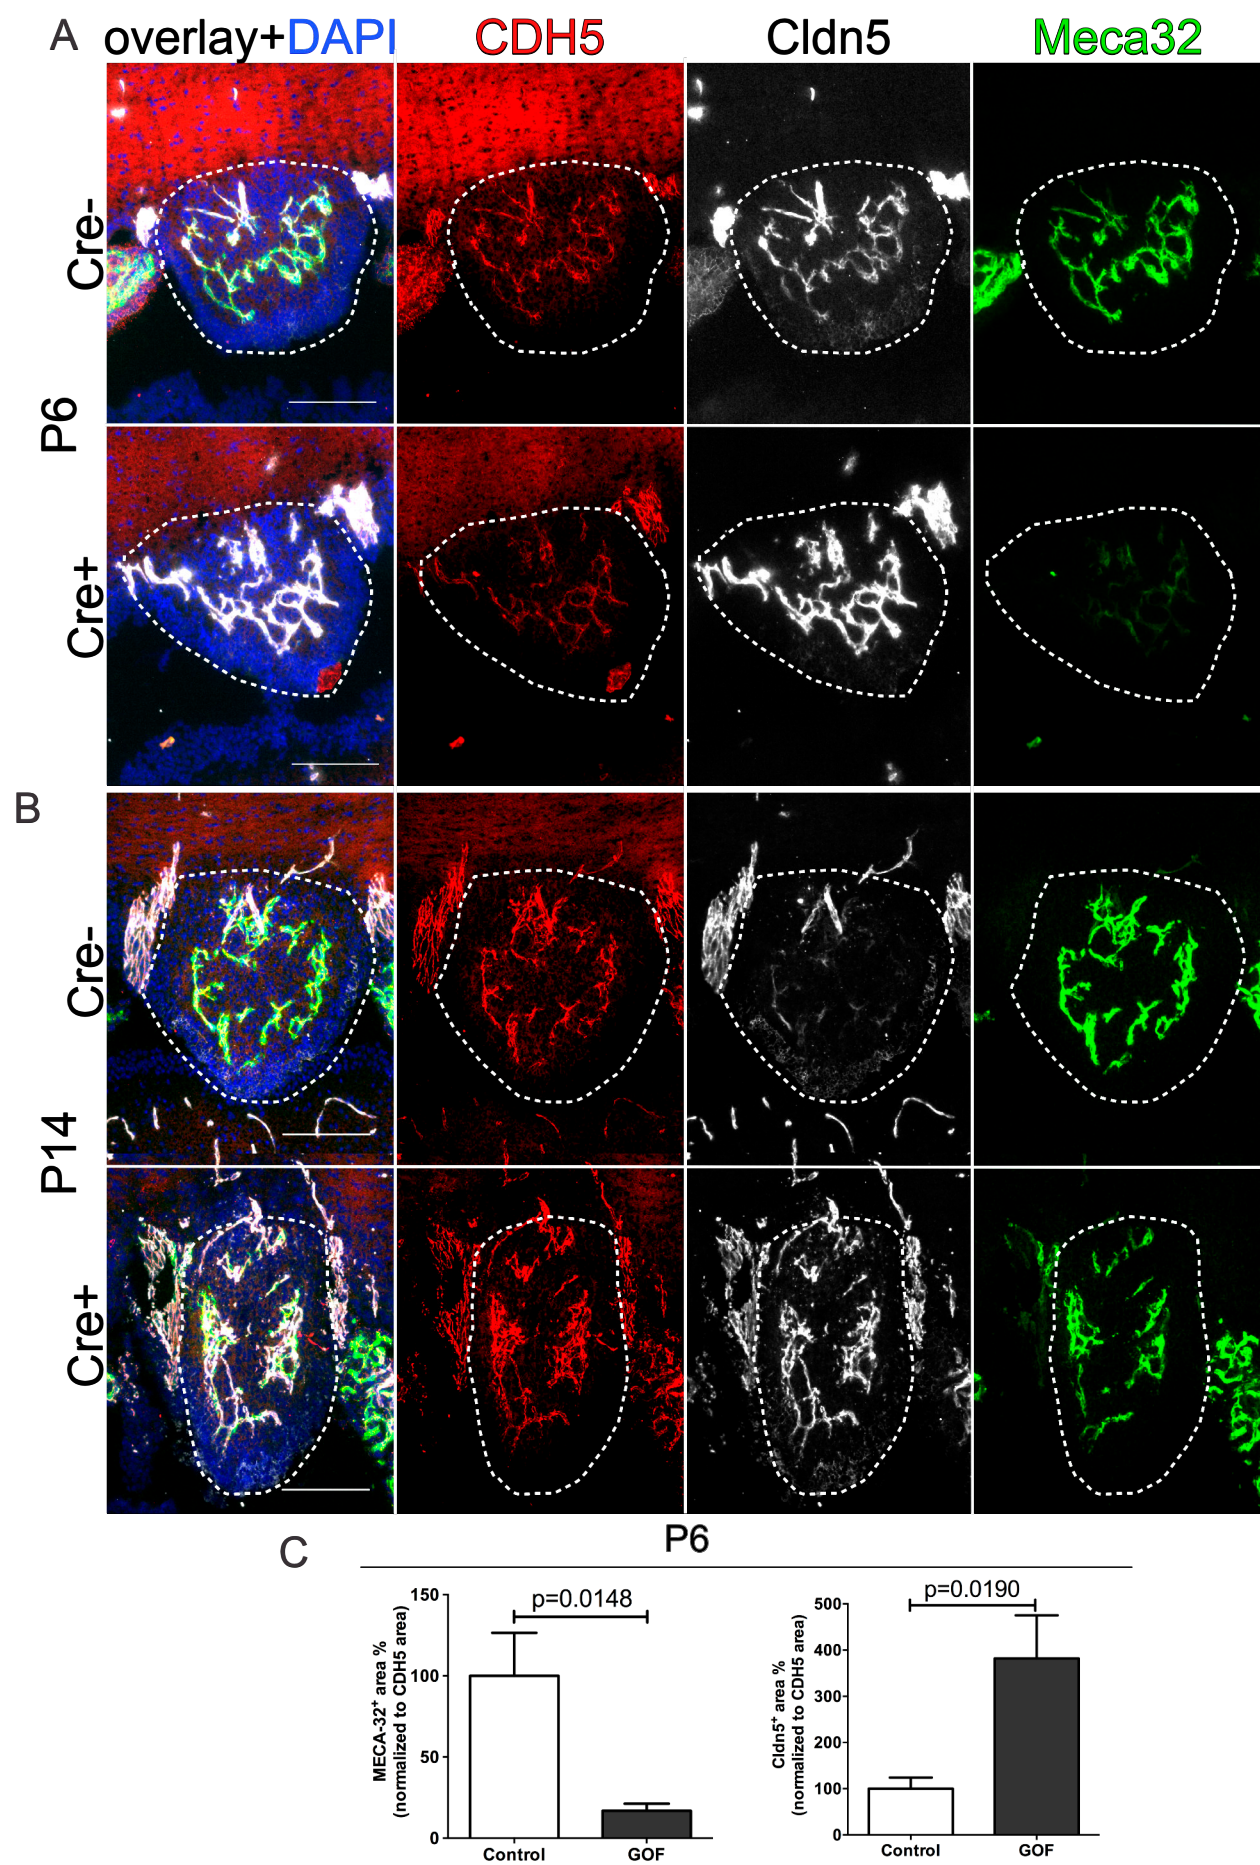

**Figure 4-figure supplement 1: Tightening of subfornical organ (SFO) vessels at early postnatal stages.** (A) Cre recombinase of *Cdh5*(PAC)-CreERT2:*Ctnnb1*<sup>Ex3fl/fl</sup> was induced by tamoxifen injection (TAM) from P0 to P3. Analysis of *Cldn5* and *Plvap*/*Meca32* at P6 (A) and P14 (B) and the resulting quantification (for P6) of marker area normalized to *Cdh5* area (C) (n=3; a.u., arbitrary units). Scale bar 100  $\mu$ m; error bars show  $\pm$ SEM.
