# Supplementary material for: Low wnt/β-catenin signaling determines leaky vessels in the subfornical organ and affects water homeostasis in mice
Source: eLife journal article supplement (doi:10.7554/elife.43818), 2019-04-01
Supplement: supp [file elife-43818-supp-v1.zip › elife_poa_e43818_Figure_4_figure_supplement_1_source_data_1.xlsx]

## Sheet: Fig 4-fig_supplement 1C - Figur
Figure 4-figure supplement 1: Tightening of subfornical organ (SFO) vessels at early postnatal stages.
Animal	Cdh5 Area
Ctrl_#1	5478.11
Ctrl_#2	5303.9
Ctrl_#3	6353.43
Ctrl_#4	3302.09
Ctrl_#5	8423.26
GOF_#1	2535.88
GOF_#2	5996.79
GOF_#3	10204.8
GOF_#4	5207.8
GOF_#5	2698.65
Animal	MECA32 Area	MECA Area/ Cdh5 area	% Meca32 Area/CDH5 area	Claudin5 Area	Claudin5 Area/ Cdh5 area	% Claudin5 Area/CDH5 area
Ctrl_#1	5043.06	0.920582	68.7447	2250.9	0.41089	85.5184
Ctrl_#2	7209.82	1.35934	101.509	2996	0.564868	117.566
Ctrl_#3	6724.52	1.05841	79.0369	1911.32	0.300833	62.6123
Ctrl_#4	8875.27	2.68777	200.71	2925.8	0.886044	184.412
Ctrl_#5	5639.84	0.669556	49.9993	2019.18	0.239715	49.8917
		1.33913	100		0.48047	100
GOF_#1	461.476	0.181979	13.5893	8994.04	3.54671	738.176
GOF_#2	2654.86	0.442714	33.0598	8018.78	1.33718	278.306
GOF_#3	946.249	0.092726	6.92434	9900.67	0.970199	201.927
GOF_#4	1098.72	0.210976	15.7547	8098.13	1.555	323.642
GOF_#5	544.265	0.20168	15.0605	4774.3	1.76914	368.211
		0.226015	16.8777			382.053
