# Supplementary material for: Low wnt/β-catenin signaling determines leaky vessels in the subfornical organ and affects water homeostasis in mice
Source: eLife journal article supplement (doi:10.7554/elife.43818), 2019-04-01
Supplement: supp [file elife-43818-supp-v1.zip › elife_poa_e43818_Figure_4_figure_supplement_2.pdf]

## Figure 4-figure supplement 2\_Benz et al.\_R1

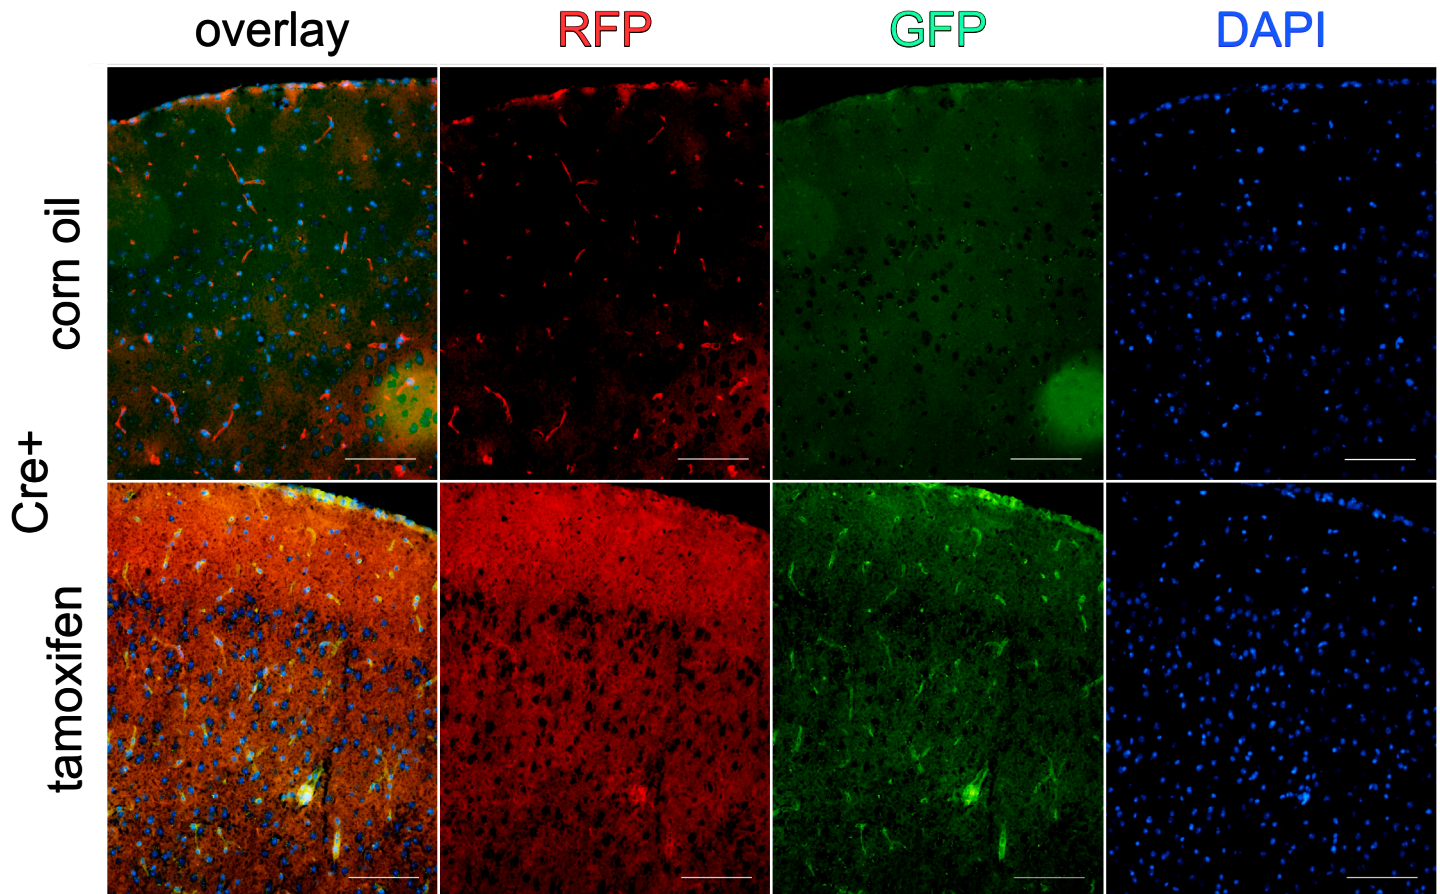

**Figure 4-figure supplement 2: Recombination of Cdh5(PAC)-CreERT2 in brain vasculature.** Cdh5(PAC)-CreERT2:mTmG<sup>fl/wt</sup> mice either injected with tamoxifen or corn oil were analyzed for recombination. Scale bar 100  $\mu$ m.
