# Supplementary material for: Low wnt/β-catenin signaling determines leaky vessels in the subfornical organ and affects water homeostasis in mice
Source: eLife journal article supplement (doi:10.7554/elife.43818), 2019-04-01
Supplement: supp [file elife-43818-supp-v1.zip › elife_poa_e43818_Figure_4_figure_supplement_3.pdf]

Figure 4-figure supplement 3\_Benz et al.\_R1

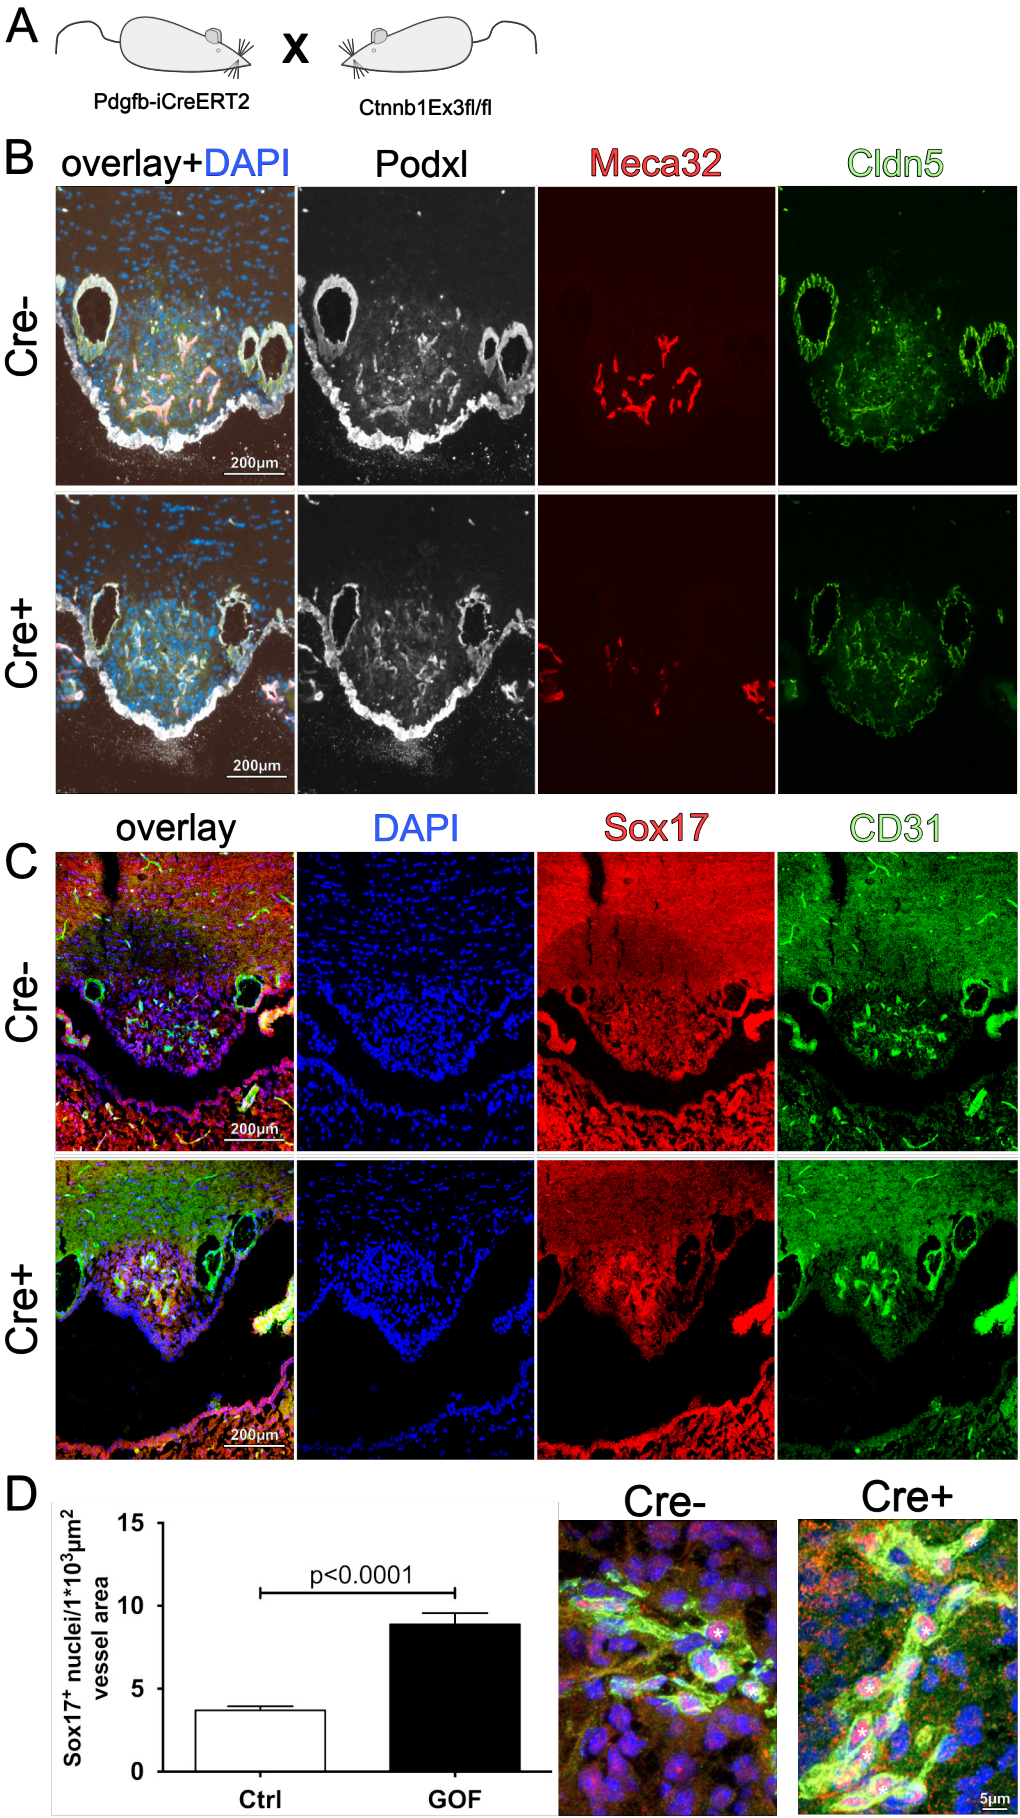

**Figure 4-figure supplement 3: *Pdgfb-iCreERT2:Ctnnb1<sup>fl/wt</sup>* show tightening of subfornical organ (SFO) vasculature.** (A) Scheme of used mouse lines. (B) Adult SFO from control (Cre-) and  $\beta$ -catenin GOF (Cre+) mice (C). Overview of Sox17 induction in Cre- and Cre+ mice in the SFO. (D) Quantification (n=3) and a higher magnification of confocal Sox17 staining. Asterisks indicate positive Sox17 staining in endothelial cells. Scale bar 100  $\mu$ m; error bars show  $\pm$ SEM.
