# Supplementary material for: Low wnt/β-catenin signaling determines leaky vessels in the subfornical organ and affects water homeostasis in mice
Source: eLife journal article supplement (doi:10.7554/elife.43818), 2019-04-01
Supplement: supp [file elife-43818-supp-v1.zip › elife_poa_e43818_Figure_4_figure_supplement_3_source_data_1.xlsx]

## Sheet: Fig 4-figure supplement 3D - Fi
Figure 4-figure supplement 3: Pdgfb-iCreERT2:Ctnnb1fl/wt show tightening of subfornical organ (SFO) vasculature.
animal	Sox17+ Nuclei	Area µm2	Nuclei/Area [Nuclei/µm2]
GOF_#1	8	731.58	1.09352
GOF_#1	11	2997.25	0.367003
GOF_#1	16	3343.15	0.47859
GOF_#1	12	1208.58	0.992902
GOF_#2	8	1105.95	0.72336
GOF_#2	10	2285.43	0.437554
GOF_#2	17	1489.53	1.1413
GOF_#2	16	1357.72	1.17844
GOF_#3	10	1584.87	0.630965
GOF_#3	17	2377.92	0.71491
GOF_#3	14	2901.96	0.482433
GOF_#3	12	897.522	1.33701
∑	151	22281.5	0.00677693
∑/12	23.2308	3427.92	0.00677693
Ctrl_#1	6	2915.09	0.205826
Ctrl_#2	10	2614.28	0.382515
Ctrl_#2	9	3501.73	0.257016
Ctrl_#2	8	1842.26	0.434249
Ctrl_#2	9	1973.47	0.45605
Ctrl_#3	12	2963.32	0.404951
Ctrl_#3	9	2323.45	0.387355
Ctrl_#3	9	1337.31	0.672992
∑	72	19470.9	0.00369782
∑/8	16	4326.87	0.00369782
