# Supplementary material for: Low wnt/β-catenin signaling determines leaky vessels in the subfornical organ and affects water homeostasis in mice
Source: eLife journal article supplement (doi:10.7554/elife.43818), 2019-04-01
Supplement: supp [file elife-43818-supp-v1.zip › elife_poa_e43818_Figure_4_source_data_1.xlsx]

## Sheet: Fig 4 (F,G)
Figure 4: Enodthelial-specific β-catenin GOF tightens the vasculature of the subfornical organ (SFO).
Day	Genotype	Animal	Section	Cldn5/Podxl (per section)	Meca32/Podxl (per section)	Cldn5/Podxl (per animal)	Meca32/Podo (per animal)	Cldn5/Podxl (per genotype)	Meca32/Podxl (per genotype)
D16	Ctr	#3692	sec4	0.141097	0.275156	0.141097	0.275156	0.140112	0.396749
		#3835	sec3	0.0764402	0.839381	0.112755	0.487672
		#3835	sec2	0.149069	0.135964
		#3693	1_7_ sec4	0.11897	0.502482	0.166484	0.42742
		#3693	1_4_sec3	0.213998	0.352359
D16	GOF	#3694	sec5	0.346959	0.248673	0.346959	0.248673	0.364404	0.158294
		#3879	sec3	0.309639	0.151992	0.309639	0.151992
		#3833	1_9_sec5	0.363862	0.0702833	0.436613	0.0742183
		#3833	sec4	0.542503	0.0510951
		#3833	1_7_sec5	0.403474	0.101276
D19	Ctr	#3824	sec4	0.251074	0.355784	0.176235	0.533825	0.109854	0.410623
		#3824	sec5	0.02228	0.69604
		#3824	sec6	0.255352	0.549651
		#3900	sec4	0.0721879	0.330384	0.0465919	0.450622
		#3900	sec5	0.020996	0.570859
		#3829	1_5_sec4	0.176968	0.156035	0.106734	0.247424
		#3829	1_5_sec5	0.0871089	0.266738
		#3829	1_5_sec6	0.0561264	0.319499
D19	GOF	#3905	sec3	0.325548	0.0374213	0.413735	0.11618	0.387361	0.0803153
		#3905	sec4	0.501922	0.194939
		#3906	sec5	0.450698	0.136277	0.312058	0.0730532
		#3906	sec4	0.173417	0.00982964
		#3903	1_7_sec5	0.336822	0.0238043	0.436289	0.0517124
		#3903	1_10_sec4	0.572126	0.0340462
		#3903	1_10_sec5	0.39992	0.0972867
D26	Ctr	#3909	sec3	0.0969769	0.4619	0.149367	0.412337	0.129323	0.519367
		#3909	sec4	0.201757	0.362774
		#3901	sec4	0.138607	0.60002	0.108145	0.642565
		#3901	sec5	0.0776831	0.685109
		#3951	1_10_sec3	0.190322	0.390946	0.130457	0.503198
		#3951	1_10_sec4	0.0926317	0.63601
		#3951	1_10_sec5	0.108417	0.482638
D26	GOF	#3907	sec3	0.558958	0.0502856	0.468171	0.0381566	0.468171	0.0381566
		#3907	sec4	0.422519	0.0376181
		#3907	sec3	0.423035	0.026566	0.508775	0.0566567
		#3954	sec4	0.594515	0.0867473
		#3954	1_10_sec2	0.592951	0.0169458	0.599546	0.00847288
		#3953	1_10_sec1	0.60614	0

## Sheet: Fig 4(F,G)
Figure 4: Enodthelial-specific β-catenin GOF tightens the vasculature of the subfornical organ (SFO).
Day	Genotype	Animal	Section	Cldn5/Podxl (per section)	Meca32/Podxl (per section)	Cldn5/Podxl (per animal)	Meca32/Podo (per animal)	Cldn5/Podxl (per genotype)	Meca32/Podxl (per genotype)
D16	Ctr	#3692	sec4	0.141097	0.275156	0.141097	0.275156	0.140112	0.396749
		#3835	sec3	0.0764402	0.839381	0.112755	0.487672
		#3835	sec2	0.149069	0.135964
		#3693	1_7_ sec4	0.11897	0.502482	0.166484	0.42742
		#3693	1_4_sec3	0.213998	0.352359
D16	GOF	#3694	sec5	0.346959	0.248673	0.346959	0.248673	0.364404	0.158294
		#3879	sec3	0.309639	0.151992	0.309639	0.151992
		#3833	1_9_sec5	0.363862	0.0702833	0.436613	0.0742183
		#3833	sec4	0.542503	0.0510951
		#3833	1_7_sec5	0.403474	0.101276
D19	Ctr	#3824	sec4	0.251074	0.355784	0.176235	0.533825	0.109854	0.410623
		#3824	sec5	0.02228	0.69604
		#3824	sec6	0.255352	0.549651
		#3900	sec4	0.0721879	0.330384	0.0465919	0.450622
		#3900	sec5	0.020996	0.570859
		#3829	1_5_sec4	0.176968	0.156035	0.106734	0.247424
		#3829	1_5_sec5	0.0871089	0.266738
		#3829	1_5_sec6	0.0561264	0.319499
D19	GOF	#3905	sec3	0.325548	0.0374213	0.413735	0.11618	0.387361	0.0803153
		#3905	sec4	0.501922	0.194939
		#3906	sec5	0.450698	0.136277	0.312058	0.0730532
		#3906	sec4	0.173417	0.00982964
		#3903	1_7_sec5	0.336822	0.0238043	0.436289	0.0517124
		#3903	1_10_sec4	0.572126	0.0340462
		#3903	1_10_sec5	0.39992	0.0972867
D26	Ctr	#3909	sec3	0.0969769	0.4619	0.149367	0.412337	0.129323	0.519367
		#3909	sec4	0.201757	0.362774
		#3901	sec4	0.138607	0.60002	0.108145	0.642565
		#3901	sec5	0.0776831	0.685109
		#3951	1_10_sec3	0.190322	0.390946	0.130457	0.503198
		#3951	1_10_sec4	0.0926317	0.63601
		#3951	1_10_sec5	0.108417	0.482638
D26	GOF	#3907	sec3	0.558958	0.0502856	0.468171	0.0381566	0.468171	0.0381566
		#3907	sec4	0.422519	0.0376181
		#3907	sec3	0.423035	0.026566	0.508775	0.0566567
		#3954	sec4	0.594515	0.0867473
		#3954	1_10_sec2	0.592951	0.0169458	0.599546	0.00847288
		#3953	1_10_sec1	0.60614	0
