# Supplementary material for: Low wnt/β-catenin signaling determines leaky vessels in the subfornical organ and affects water homeostasis in mice
Source: eLife journal article supplement (doi:10.7554/elife.43818), 2019-04-01
Supplement: supp [file elife-43818-supp-v1.zip › elife_poa_e43818_Figure_5_figure_supplement_1.pdf]

# Figure 5-figure supplement 1\_Benz et al.\_R1

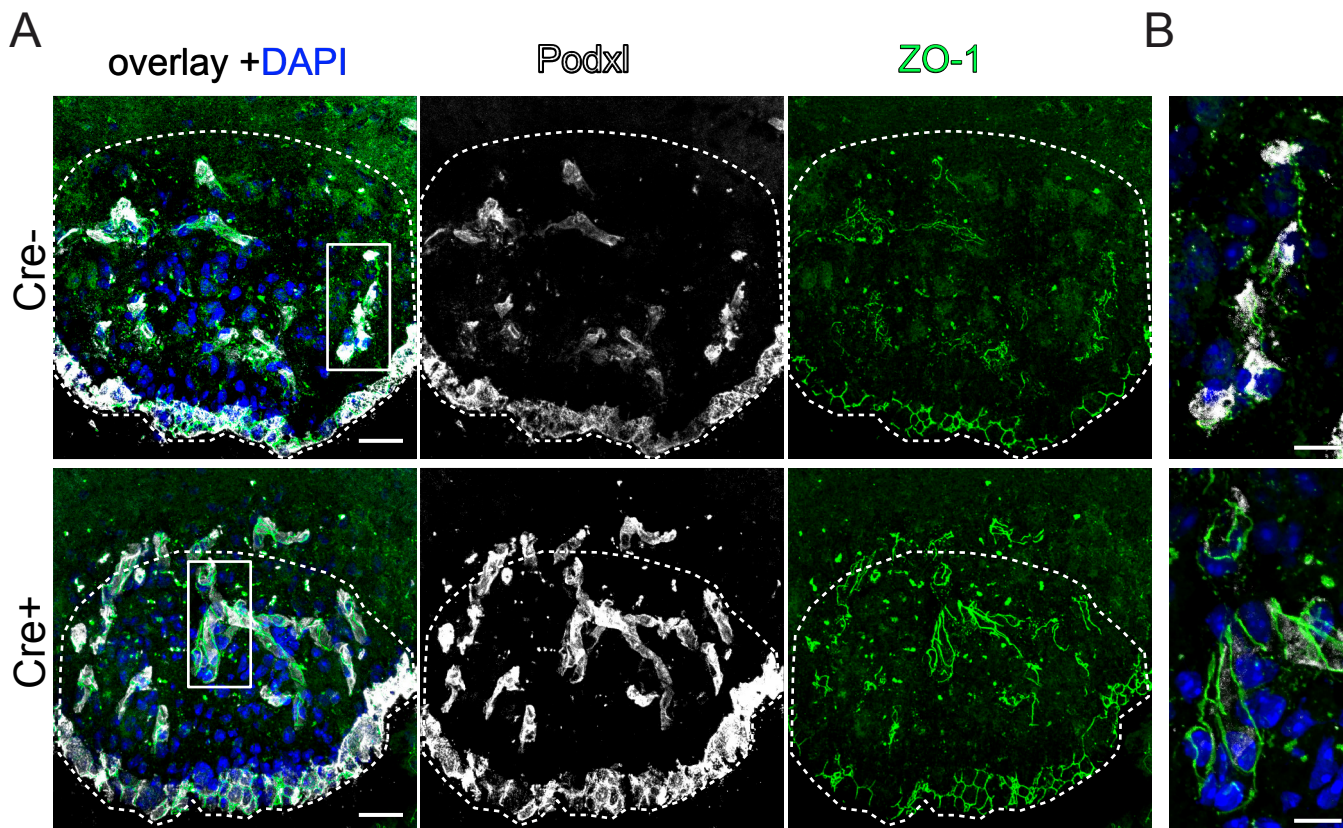

**Figure 5-figure supplement 1: Endothelial-specific  $\beta$ -catenin GOF did not lead to an evident increase in ZO-1 localization at cell-cell junctions in the vasculature of the subfornical organ (SFO).** Coronal view of the subfornical organ (SFO) 26 days after the first TAM injection stained for podocalyxin as a vascular/luminal marker, ZO-1 and DAPI (**A**). Higher magnification of an SFO vessel indicated by the rectangular inset in A (**B**). Dashed line demarcates the SFO. Scale bars: 25 $\mu$ m (**A**), 10 $\mu$ m (**B**).
