# Supplementary material for: Low wnt/β-catenin signaling determines leaky vessels in the subfornical organ and affects water homeostasis in mice
Source: eLife journal article supplement (doi:10.7554/elife.43818), 2019-04-01
Supplement: supp [file elife-43818-supp-v1.zip › elife_poa_e43818_Figure_5_source_data_1.xlsx]

## Sheet: Fig 5 (C) - Figure 5_ Endotheli
Figure 5: Endothelial-specific β-catenin GOF leads to increased occludin localization at cell-cell junctions in the vasculature of the subfornical organ (SFO).
Genotype	Animal	Section	ColIV (per section)	ColIV (mean per slide)	ColIV (mean per condition)	Vessel normalization factor
Ctr	#3147 =#1		4124.64
			5560.96
			3889.63	4525.08
	#3332 =#2		291.417
			1036.18
			2572.83
			1419.33	1329.94
	#3151 =#3		1402.43
			912.874
			982.783
			1811.55	1277.41	2377.47
GOF	#3698 =#1		2716.58
			3780.88
			3120.8	3206.09
	#3830 =#2		3239.19
			2473.08
			3430.08	3047.45
	#3698 =#3		3908.83
			2416.31
			789.857
			3529.44	2661.11	2971.55	1.24988
							Genotype	Animal	Section	ColIV (per section)	Ocln (Sum per slide)	Normalization factor	Ocln (Sum normalised to vessel area)
							Ctr	#3147 =#1		75.79
										26.66
										26.84
										14.01
										46.53
										14.86
										15.61
										9.89
										52.81
										6.11
										26.79
										62.23
										63.91
										32.71	474.75	1.24988	593.379
								#3332 =#2		41.46
										18.78
										7.86
										13.96
										11.89
										44.73
										19.59
										12.54
										7.59
										16.1
										9.73
										32.1
										9.85
										39.46
										19.12
										8.14
										9.63
										17.89
										8.92
										14.68
										9.18
										4.76
										22.58
										4.6
										5.29
										27.28
										9.02
										10.89
										12.42
										9.37
										21.35
										25.32
										22.5
										43.68
										13.61
										22.27
										9.96
										9.46
										13.65
										15.86	677.07	1.24988	846.254
								#3151 =#3		25.07
										34.11
										11.21
										10.71
										9.97
										3.54
										25.07
										34.11
										11.21
										10.71
										9.97
										3.54
										13.78
										26.3
										9.06
										23.05
										17.12
										36.01
										4.21
										40.83
										29.93
										28.14
										19.94
										23.46
										12.11
										19.65
										14.78
										14.72
										15.88
										19.36
										9.3
										23.17
										26.81				593.379
										11.14				846.254
										8.61	636.58	1.24988	795.646	795.646
							GOF	#3698 =#1		8.05
										22.56
										30.89
										30.68
										19.83
										22.18
										47.34
										41.39
										23.25
										22.6
										24.04
										11.17
										12.23
										18.28
										30.51
										22.55
										26.28
										31.13
										55.75
										11.85
										24.96
										33.51
										10.9
										20.55
										12.14
										10.63
										4.5
										14.07
										6.92
										20.46
										8.22
										42.05
										8.18
										42.23
										24.01
										30.49
										20.69
										39.61
										7.61
										7.98
										21.18
										23.96
										20.87
										16.8
										17.7
										12.34
										34.53
										4.9
										13.38
										38.16
										12.45
										29.55
										24.9
										30.39
										27.97
										58.49
										45.75
										13.46
										7.14
										17.13
										9.61
										24.16
										11.97
										20
										4.33
										12.72
										10.47
										6.13
										17.4
										17.92
										48.39
										23.74
										14.56
										62.52
										10.62
										45.37
										28.31
										18.72
										7.67
										13.38
										22.58
										37.97
										15.1
										16.01
										16.36
										10.18
										5.63
										18.94
										17.53
										27.53
										27.29
										13.18
										22.08
										63.88
										28.16
										29.07
										23.64
										22.65
										38.71
										18.16
										36.78
										37.17
										33.69
										16.89
										19.65
										19.72
										16.77
										46.59
										25.52
										20.59
										23.72
										24.65
										9.84
										21.63
										19.28	2628.45	1	2628.45
								#3830 =#2		19.11
										12.57
										23.16
										22.69
										22.31
										22.46
										14.32
										13.09
										4.18
										30.72
										21.43
										7.22
										16.28
										12.98
										30.15
										14.53
										8.08
										7.55
										22.65
										9.95
										47.69
										17.21
										10.29
										21.09
										35.69
										8.86
										13.63
										9.37
										13.61
										22.05
										31.02
										22.06
										37.73
										33.63
										27.86
										28.61
										22.39
										37.08
										12.33
										43.42
										8.11
										77.67
										36.67
										20.61
										28.49
										44.1
										13.28
										44.56
										21.83
										22.65
										20.91
										9.88
										25.81
										19.57
										11.77
										19.92
										56.26
										38.49
										10.72
										36.11
										35.45
										23.17
										9.76
										10.56
										27.71
										12.57
										25
										21.87
										13.15
										21.54
										33.32
										9.86
										21.61
										8.76
										31.24
										48.46
										11.99
										40.37
										27.35
										24.36
										10.54
										36.69
										18.96	1922.75	1	1922.75
								#3698 =#3		113.43
										52.69
										50.05
										31.91
										26.34
										14.98
										24.03
										33.74
										24.57
										38.6
										11.52
										8.36
										20.44
										23.23
										29.1
										41.01
										39.08
										36.48
										30.77
										34.38
										10.55
										12.74
										17.85
										78.65
										70.09
										24.51
										9.59
										36.13
										28.23
										14.72
										34.24
										39
										28.97
										17.6
										39.42
										9.77
										13.7
										15.34
										21.22
										32.6
										7.18
										28.93
										36.49
										37.39
										30.48
										28.18
										13.6
										29.84
										20.22
										37.61
										8.54
										39.34
										17.4
										13.97
										41.81				2628.45
										35.19				1922.75
										22.34	1688.14	1	1688.14	1688.14
