# Supplementary material for: Low wnt/β-catenin signaling determines leaky vessels in the subfornical organ and affects water homeostasis in mice
Source: eLife journal article supplement (doi:10.7554/elife.43818), 2019-04-01
Supplement: supp [file elife-43818-supp-v1.zip › elife_poa_e43818_Figure_5_source_data_2.xlsx]

## Sheet: Fig5 (D) - Figure 5_ Endothelia
Figure 5: Endothelial-specific β-catenin GOF leads to increased occludin localization at cell-cell junctions in the vasculature of the subfornical organ (SFO).
	Cre-	Cre+
∆∆ ct norm to RPLP0	0.00868856	0.00859869
