# Supplementary material for: Low wnt/β-catenin signaling determines leaky vessels in the subfornical organ and affects water homeostasis in mice
Source: eLife journal article supplement (doi:10.7554/elife.43818), 2019-04-01
Supplement: supp [file elife-43818-supp-v1.zip › elife_poa_e43818_Figure_6_source_data_1.xlsx]

## Sheet: Fig 6 (B) - Figure 6_ Reduction
Figure 6: Reduction of vascular permeability by endothelial specific β-catenin gain-of- function.
Genotype	Animal	FITC covered SFO area	Podxl covered SFO area	(FITC/Podxl) covered SFO area	average (FITC/Podxl) covered SFO area per animal	average (FITC/Podxl) covered SFO area per genotype
Ctr	4503	65982.6	63443.2	1.04003	2.06392	1.94958
	4503	153774	49800.2	3.08781
	4550	178044	160418	1.10987	1.39973
	4550	144794	85697.9	1.68959
	4507	142330	106867	1.33184	1.75603
	4507	102163	46858.8	2.18022
	3956	486845	188799	2.57864	2.57864
GOF	4506	72012.8	75715	0,951103750762233	1.19648	0.971027
	4506	111406	77266.1	1.44185
	4505	59512.4	133841	0,444649862116376	0.640284
	4505	80378.7	96156.1	0,835918834869187
	3889	165150	153440	1.07632	1.07632
