# Supplementary material for: Low wnt/β-catenin signaling determines leaky vessels in the subfornical organ and affects water homeostasis in mice
Source: eLife journal article supplement (doi:10.7554/elife.43818), 2019-04-01
Supplement: supp [file elife-43818-supp-v1.zip › elife_poa_e43818_Figure_7_figure_supplement_2.pdf]

# Figure 7-figure supplement 2\_Benz et al.\_R1

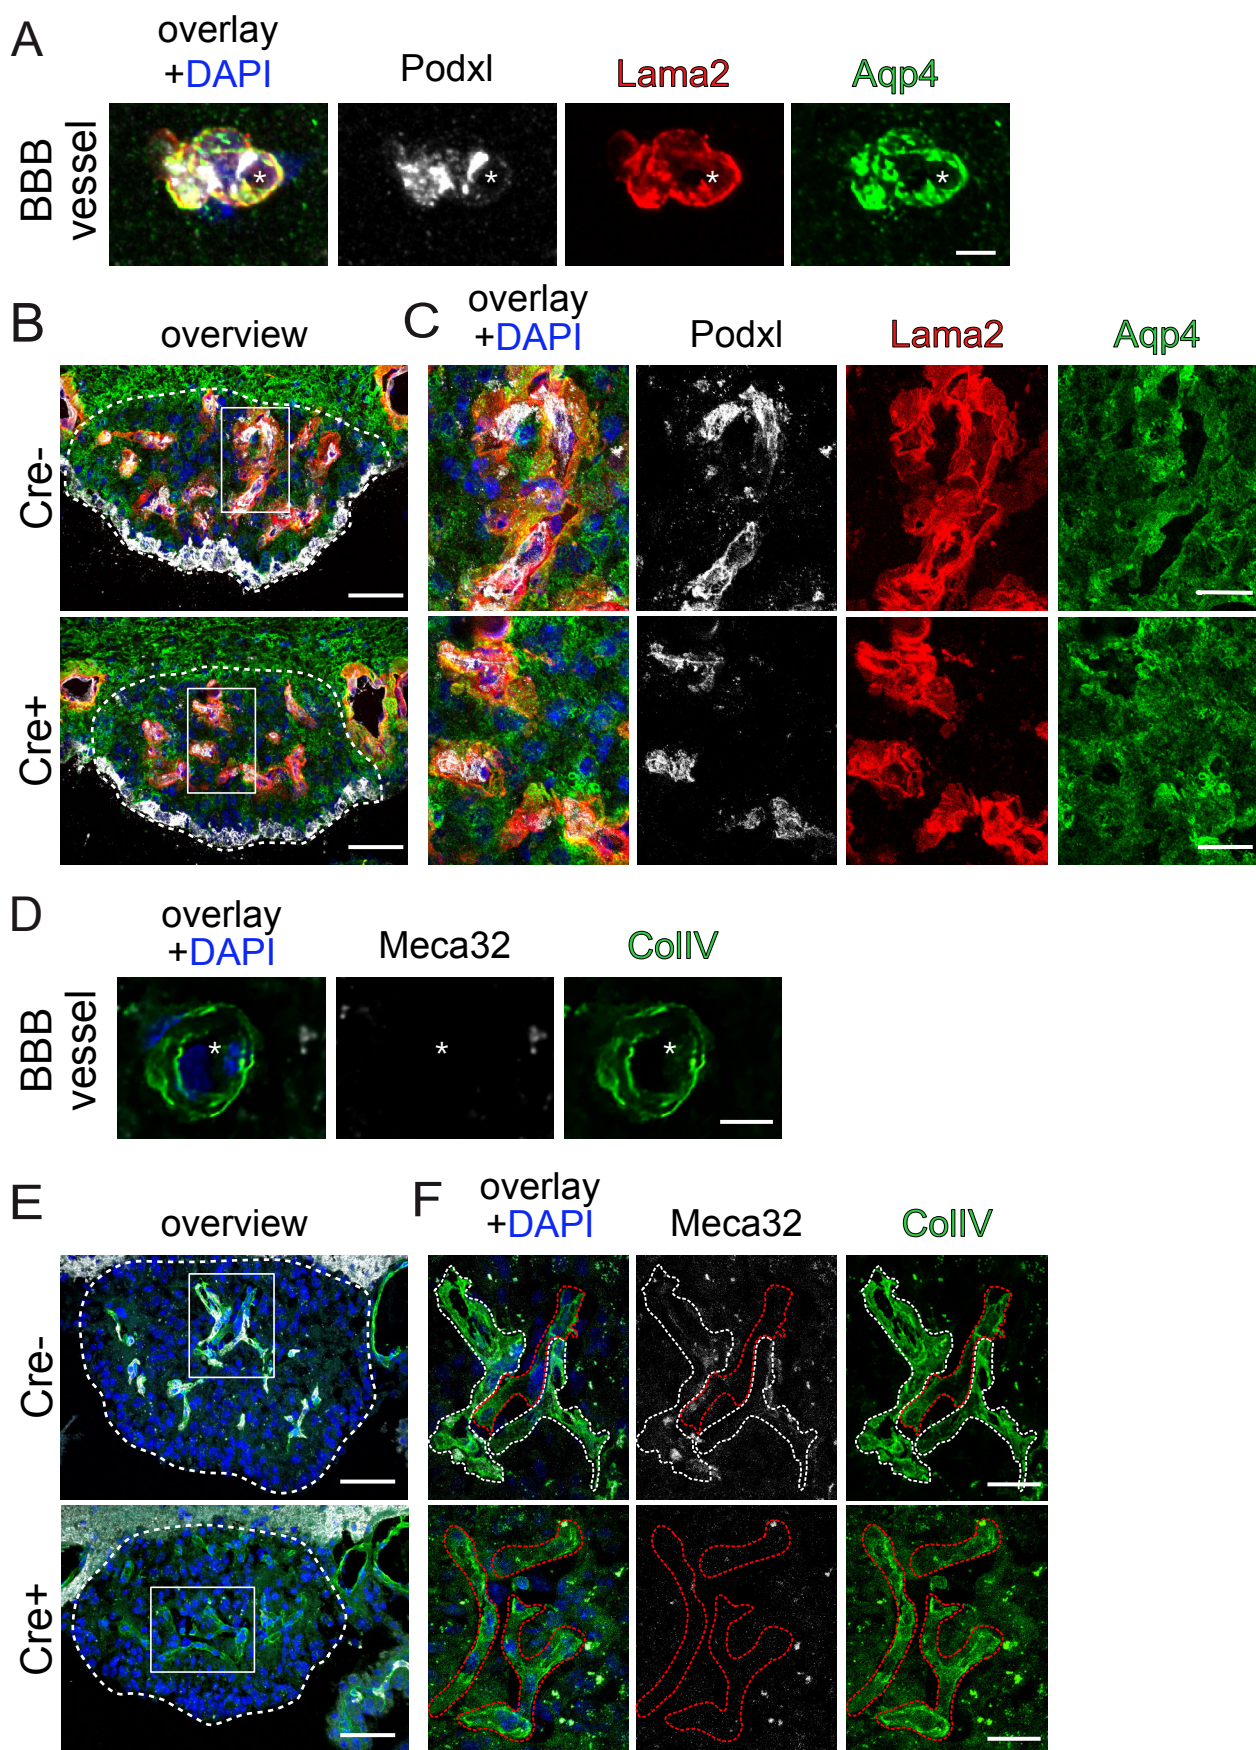

**Figure 7-figure supplement 2: Endothelial  $\beta$ -catenin GOF does not affect the ECM of astrocytic endfeet and ECs within the subfornical organ (SFO).** Striatal BBB-vessel showing a polarized distribution of Lama2 and Aqp4 in AC endfeet. Lumen is stained by Podxl (asterisk) (A). Coronal overview of the subfornical organ (SFO) (B); rectangular inset demarcates area for higher magnification in (C). Striatal BBB-vessel showing a polarized distribution of ColIV (green) but no Meca32 (white) in ECs (D). Coronal overview SFO, rectangular inset demarcates area for higher magnification in F (E); white dashed lines show Meca32<sup>+</sup>, red dashed lines show Meca32<sup>-</sup> vessels (F). Dashed lines outline SFO vessels; scale bars show 2  $\mu$ m (A), 50  $\mu$ m (B), 10  $\mu$ m (C), 2.5  $\mu$ m (D), 50  $\mu$ m (E), 10  $\mu$ m (F).
