# Supplementary material for: Low wnt/β-catenin signaling determines leaky vessels in the subfornical organ and affects water homeostasis in mice
Source: eLife journal article supplement (doi:10.7554/elife.43818), 2019-04-01
Supplement: supp [file elife-43818-supp-v1.zip › elife_poa_e43818_Figure_7_source_data_1.xlsx]

## Sheet: Fig 7 (D) - Figure 7_ Tightenin
Figure 7: Tightening of vessels in the subfornical organ (SFO) on cellular level.
Genotype	Mouse	Vessel	Magnification	Fenestrae	Perimeter (arb. units)
Ctr	Ctr_#1	1	2,9x	39	75.545
		2	2,9x	0	49.174
		3	4,8x	5	89.552
	Ctr_#2	1	1,9x	22	70.382
		2	2,9x	15	53.343
		3	2,9x	16	45.561
		4	2,9x	14	87.868
	Ctr_#3	1	2,9x	27	85.27
		2	2,9x	0	48.152
		3	2,9x	26	74.603
	Ctrl_#4	1	2,9x	24	115.837
		2	2,9x	12	41.96
		3	2,9x	11	92.461
		4	2,9x	12	66.984
		5	2,9x	14	59.887
				15.8	70.4386
					0.224309
GOF	GOF_#1	1	2,9x	10	101.898
		2	2,9x	2	89.971
		3	2,9x	0	72.18
	GOF_#2	1	2,9x	0	74.523
		2	2,9x	0	50.075
		3	2,9x	0	76.723
	GOF_#3	1	2,9x	0	84.905
		1	2,9x	0	104.595
		2	2,9x	0	64.797
		3	2,9x	0	102.81
		4	2,9x	0	56.644
		5	2,9x	0	74.565
	GOF_#4	1	2,9x	0	66.948
		2	2,9x	0	84.569
	GOF_#5	1	2,9x;	0	113.694
		2	2,9x	0	99.806
		3	2,9x	0	103.032
		4	2,9x	0	53.49
				12	1475.23
					0.00813435
