# Supplementary material for: Low wnt/β-catenin signaling determines leaky vessels in the subfornical organ and affects water homeostasis in mice
Source: eLife journal article supplement (doi:10.7554/elife.43818), 2019-04-01
Supplement: supp [file elife-43818-supp-v1.zip › elife_poa_e43818_Figure_8_figure_supplement_1_source_data_1.xlsx]

## Sheet: Fig 8-figure supplement 1 - Fig
Figure 8-figure supplement 1: Dose dependent neuronal activity upon sodium chloride injection.
Condition	animal	dapi+	cfos+	cfos/dapi (per section)	cfos/dapi (per animal)	dapi/cfos (per genotype)
Isotonic NaCl	Ctr1	157	0	0	0	0.000509684
	Ctr1	223	0	0
	Ctr1	153	0	0
	Ctr2	144	0	0	0
	Ctr2	194	0	0
	Ctr2	140	0	0
	Ctr3	196	0	0	0.00152905
	Ctr3	218	1	0.00458716
	Ctr3	208	0	0
2M NaCl	1	191	12	0.0628272	0.0867871	0.0710507
	1	194	12	0.0618557
	1	199	27	0.135678
	2	333	26	0.0780781	0.0736082
	2	258	27	0.104651
	2	210	8	0.0380952
	3	142	6	0.0422535	0.0527569
	3	140	12	0.0857143
	3	99	3	0.030303
3M NaCl	1	158	23	0.14557	0.0993251	0.0854898
	1	178	18	0.101124
	1	156	8	0.0512821
	2	257	9	0.0350195	0.0913861
	2	256	30	0.117188
	2	205	25	0.121951
	3	157	14	0.089172	0.0657582
	3	118	7	0.059322
	3	82	4	0.0487805
