# Supplementary material for: Low wnt/β-catenin signaling determines leaky vessels in the subfornical organ and affects water homeostasis in mice
Source: eLife journal article supplement (doi:10.7554/elife.43818), 2019-04-01
Supplement: supp [file elife-43818-supp-v1.zip › elife_poa_e43818_Figure_8_source_data_1.xlsx]

## Sheet: Fig 8 (E, F) - Figure 8_ Neuron
Figure 8: Neuronal activation via thirst induction in wild type animals.
Condition	animal	dapi+	cfos+	cfos/dapi (per section)	cfos/dapi (per animal)	dapi/cfos (per condition)
H2O Restricted	1	150	8	0.0533333	0.0595416	0.0479173
		310	18	0.0580645
		357	24	0.0672269
	2	121	10	0.0826446	0.0651048
		249	11	0.0441767
		219	15	0.0684932
	3	226	5	0.0221239	0.0191055
		213	3	0.0140845
		379	8	0.0211082
H2O Ad libitum	ctrl1	262	1	0.00381679	0.00127226	0.000424088
		172	0	0
		157	0	0
	Ctrl2	158	0	0	0
		355	0	0
	Ctrl3	204	0	0	0
		187	0	0
		115	0	0
Isotonic NaCl injection	Male 1	262	0	0	0.00179373	0.00275783
		178	0	0
		87	0	0
		229	0	0
		149	0	0
		152	0	0
		212	0	0
		256	3	0.0117188
		226	1	0.00442478
	Male 2	130	9	0.0692308	0.00769231
		115	0	0
		112	0	0
		234	0	0
		253	0	0
		239	0	0
		311	0	0
		341	0	0
		331	0	0
	Male 3	121	0	0	0.00347222
		156	0	0
		157	0	0
		171	0	0
		141	0	0
		64	2	0.03125
		271	0	0
		276	0	0
		355	0	0
3M NaCl injection	Male 1	160	6	0.0375	0.0984334	0.08209
		103	5	0.0485437
		250	1	0.004
		118	1	0.00847458
		113	15	0.132743
		187	9	0.0481283
		253	38	0.150198
		266	48	0.180451
		290	80	0.275862
	Male 2	230	0	0	0.0135183
		146	0	0
		211	4	0.0189573
		150	3	0.02
		158	4	0.0253165
		164	9	0.054878
		263	0	0
		381	0	0
		398	1	0.00251256
	Male 3	185	16	0.0864865	0.0812709
		133	8	0.0601504
		194	20	0.103093
		174	12	0.0689655
		222	15	0.0675676
		235	49	0.208511
		373	34	0.0911528
		395	9	0.0227848
		352	8	0.0227273
	Animal	DAPI in SFO	cFos in SFO
Isotonic NaCl injection	Female 1	155	0	0	0.000600597
		265	0	0
		148	0	0
		231	0	0
		306	0	0
		294	1	0.00340136
		499	1	0.00200401
		411	0	0
		67	0	0
	Female 2	95	0	0	0.000555057
		165	0	0
		125	0	0
		133	0	0
		186	0	0
		217	0	0
		408	1	0.00245098
		393	1	0.00254453
		332	0	0
	Female 3	141	0	0	0.00243309
		149	0	0
		202	0	0
		137	3	0.0218978
		161	0	0
		175	0	0
		373	0	0
		350	0	0
		275	0	0
3M NaCl injection	Female 1	107	14	0.130841	0.12863
		67	2	0.0298507
		96	5	0.0520833
		189	19	0.100529
		267	28	0.104869
		273	41	0.150183
		339	50	0.147493
		321	69	0.214953
		335	76	0.226866
	Female 2	90	5	0.0555556	0.0945117
		83	4	0.0481928
		101	2	0.019802
		95	1	0.0105263
		86	9	0.104651
		139	10	0.0719424
		161	15	0.0931677
		276	49	0.177536
		286	77	0.269231
	Female 3	83	1	0.0120482	0.0761758
		150	7	0.0466667
		104	5	0.0480769
		156	8	0.0512821
		202	18	0.0891089
		235	28	0.119149
		338	48	0.142012
		317	46	0.14511
		249	8	0.0321285
