# Supplementary material for: Low wnt/β-catenin signaling determines leaky vessels in the subfornical organ and affects water homeostasis in mice
Source: eLife journal article supplement (doi:10.7554/elife.43818), 2019-04-01
Supplement: supp [file elife-43818-supp-v1.zip › elife_poa_e43818_Figure_9_source_data_1.xlsx]

## Sheet: Fig 9 (C) - Figure 9_ Vascular 
Figure 9: Vascular tightening effects increased neuronal activity in the subfornical organ (SFO) under thirst conditions.
Condition	animal	dapi+	cfos+	cfos/dapi (per section)	cfos/dapi (per animal)	dapi/cfos (per genotype)
Ctr	Ctr1	289	34	0.117647	0.0838683	0.0566291
	Ctr1	354	35	0.0988701
	Ctr1	342	12	0.0350877
	Ctr2	176	12	0.0681818	0.067063
	Ctr2	273	18	0.0659341
	Ctr2	328	22	0.0670732
	Ctr3	287	34	0.118467	0.0626031
	Ctr3	331	24	0.0725076
	Ctr3	381	20	0.0524934
	Ctr3	288	2	0.00694444
	Ctr4	142	4	0.028169	0.0585171
	Ctr4	189	16	0.0846561
	Ctr4	237	11	0.0464135
	Ctr4	147	11	0.0748299
	Ctr5	256	3	0.0117188	0.0181721
	Ctr5	153	6	0.0392157
	Ctr5	248	1	0.00403226
	Ctr5	395	7	0.0177215
	Ctr6	182	17	0.0934066	0.0592899
	Ctr6	214	13	0.0607477
	Ctr6	253	6	0.0237154
	Ctr7	165	12	0.0727273	0.0588463
	Ctr7	251	17	0.0677291
	Ctr7	194	7	0.0360825
	Ctr8	141	8	0.0567376	0.0782628
	Ctr8	185	15	0.0810811
	Ctr8	165	16	0.0969697
	Ctr9	397	0	0	0.0230395
	Ctr9	329	3	0.00911854
	Ctr9	300	18	0.06
GOF	GOF1	202	28	0.138614	0.107982	0.0871726
	GOF1	340	48	0.141176
	GOF1	385	17	0.0441558
	GOF2	234	34	0.145299	0.105957
	GOF2	285	30	0.105263
	GOF2	312	21	0.0673077
	GOF3	120	3	0.025	0.0400343
	GOF3	299	20	0.0668896
	GOF3	319	9	0.0282132
	GOF4	163	10	0.0613497	0.0981735
	GOF4	200	32	0.16
	GOF4	369	27	0.0731707
	GOF5	131	15	0.114504	0.0709956
	GOF5	268	22	0.0820896
	GOF5	244	4	0.0163934
	GOF6	173	14	0.0809249	0.084315
	GOF6	183	20	0.10929
	GOF6	271	17	0.0627306
	GOF7	130	7	0.0538462	0.126282
	GOF7	120	23	0.191667
	GOF7	180	24	0.133333
	GOF8	416	50	0.120192	0.0636413
	GOF8	369	22	0.0596206
	GOF8	270	3	0.0111111
