# Supplementary material for: Low wnt/β-catenin signaling determines leaky vessels in the subfornical organ and affects water homeostasis in mice
Source: eLife journal article supplement (doi:10.7554/elife.43818), 2019-04-01
Supplement: supp [file elife-43818-supp-v1.zip › elife_poa_e43818_Transparent_Reporting_File.docx]

***eLife’s* transparent reporting form**

We encourage authors to provide detailed information *within their submission* to facilitate the interpretation and replication of experiments. Authors can upload supporting documentation to indicate the use of appropriate reporting guidelines for health-related research (see [EQUATOR Network](http://www.equator-network.org/%20)), life science research (see the [BioSharing Information Resource](https://biosharing.org/" \t "_blank)), or the [ARRIVE guidelines](http://www.plosbiology.org/article/info:doi/10.1371/journal.pbio.1000412) for reporting work involving animal research. Where applicable, authors should refer to any relevant reporting standards documents in this form.

If you have any questions, please consult our Journal Policies and/or contact us: [editorial@elifesciences.org](mailto:editorial@elifesciences.org).

**Sample-size estimation**

- You should state whether an appropriate sample size was computed when the study was being designed
- You should state the statistical method of sample size computation and any required assumptions
- If no explicit power analysis was used, you should describe how you decided what sample (replicate) size (number) to use

Please outline where this information can be found within the submission (e.g., sections or figure legends), or explain why this information doesn’t apply to your submission:

The information on the sample size estimation is described in the material and methods section under “Statistical analyses”.

**Replicates**

- You should report how often each experiment was performed
- You should include a definition of biological versus technical replication
- The data obtained should be provided and sufficient information should be provided to indicate the number of independent biological and/or technical replicates
- If you encountered any outliers, you should describe how these were handled
- Criteria for exclusion/inclusion of data should be clearly stated
- High-throughput sequence data should be uploaded before submission, with a private link for reviewers provided (these are available from both GEO and ArrayExpress)

Please outline where this information can be found within the submission (e.g., sections or figure legends), or explain why this information doesn’t apply to your submission:

The information how often an experiment was performed is included in the figure legends as “n” number. A definition for biological and technical replicated is included in the material and methods section under “Statistical analyses”. No outliers were encountered.

**Statistical reporting**

- Statistical analysis methods should be described and justified
- Raw data should be presented in figures whenever informative to do so (typically when N per group is less than 10)
- For each experiment, you should identify the statistical tests used, exact values of N, definitions of center, methods of multiple test correction, and dispersion and precision measures (e.g., mean, median, SD, SEM, confidence intervals; and, for the major substantive results, a measure of effect size (e.g., Pearson's r, Cohen's d)
- Report exact p-values wherever possible alongside the summary statistics and 95% confidence intervals. These should be reported for all key questions and not only when the p-value is less than 0.05.

Please outline where this information can be found within the submission (e.g., sections or figure legends), or explain why this information doesn’t apply to your submission:

The statistical methods are described in the material and methods section under “Statistical analyses”. Raw data for all quantifications are provided in a separated MS Excel documents (Benz et al_Fig4FG_source_data 1.xlsx; Benz et al_Fig4H_source_data 2.xlsx; Benz et al_Fig4-figure_supplement1_source_data.xlsx; Benz et al_Fig4-figure_supplement3_source_data.xlsx; Benz et al_Fig5C_source_data 1.xlsx; Benz et al_Fig5D_source_data 2.xlsx; Benz et al_Fig6_source_data.xlsx; Benz et al_Fig7_soucre_data.xlsx; Benz et al_Fig8_source_data.xlsx; Benz et al_ Fig8-figure_supplement1_source_data.xlsx; Benz et al_Fig9_source_data.xlsx). Exact p-values are included in the figures whenever quantifications are depicted.

(For large datasets, or papers with a very large number of statistical tests, you may upload a single table file with tests, Ns, etc., with reference to sections in the manuscript.)

**Group allocation**

- Indicate how samples were allocated into experimental groups (in the case of clinical studies, please specify allocation to treatment method); if randomization was used, please also state if restricted randomization was applied
- Indicate if masking was used during group allocation, data collection and/or data analysis

Please outline where this information can be found within the submission (e.g., sections or figure legends), or explain why this information doesn’t apply to your submission:

Masking/blinding was applied for quantification analyses, such as counting and measuring.

**Additional data files (“source data”)**

- We encourage you to upload relevant additional data files, such as numerical data that are represented as a graph in a figure, or as a summary table
- Where provided, these should be in the most useful format, and they can be uploaded as “Source data” files linked to a main figure or table
- Include model definition files including the full list of parameters used
- Include code used for data analysis (e.g., R, MatLab)
- Avoid stating that data files are “available upon request”

Please indicate the figures or tables for which source data files have been provided:

Source data files are provided for Figures 4F-H, 5C, 6B, 7D, 8E-F, 9C as well as in Figure 4-figure supplement 1C, Figure 4-figure supplement 3D, Figure 8-figure supplement 1B. Raw data for all quantifications are provided in a separated MS Excel documents (Benz et al_Fig4FG_source_data 1.xlsx; Benz et al_Fig4H_source_data 2.xlsx; Benz et al_Fig4-figure_supplement1_source_data.xlsx; Benz et al_Fig4-figure_supplement3_source_data.xlsx; Benz et al_Fig5C_source_data 1.xlsx; Benz et al_Fig5D_source_data 2.xlsx; Benz et al_Fig6_source_data.xlsx; Benz et al_Fig7_soucre_data.xlsx; Benz et al_Fig8_source_data.xlsx; Benz et al_ Fig8-figure_supplement1_source_data.xlsx; Benz et al_Fig9_source_data.xlsx).
